# The American Journal of Psychiatry

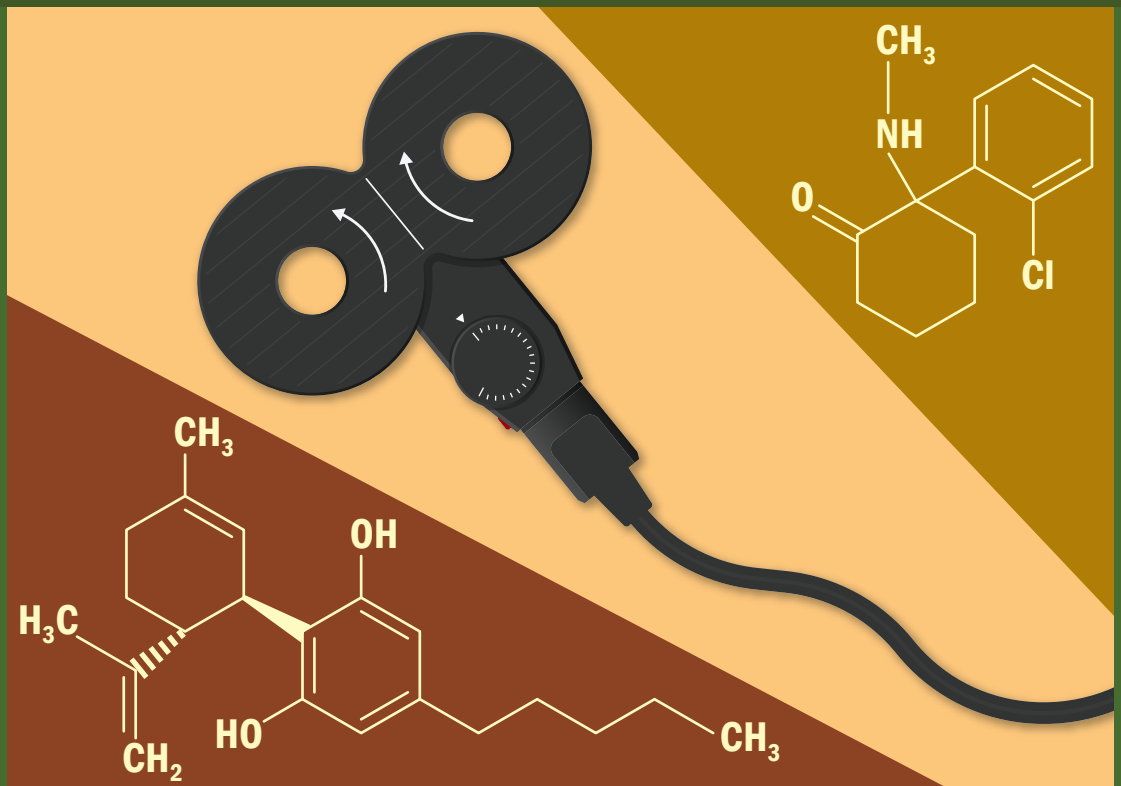

Developing Innovative and Novel Treatment Strategies

Whither TMS: A One-Trick Pony or the Beginning  
of a Neuroscientific Revolution?

Cannabidiol for the Reduction of Cue-Induced Craving and Anxiety  
in Drug-Abstinent Individuals With Heroin Use Disorder

A Single Ketamine Infusion Combined With Mindfulness-Based  
Behavioral Modification to Treat Cocaine Dependence
