## PERSPECTIVAS

### NOTA DEL EDITOR

- 885 Desarrollo de estrategias de tratamiento innovadoras y novedosas**  
*Ned H. Kalin, M.D.*

### EDITORIALES

- 888 Cannabidiol: No es una panacea, sino un candidato para afrontar el deseo vehemente de consumir drogas inducida por estímulos**  
*David H. Epstein, Ph.D.*
- 892 En búsqueda de tratamientos para el trastorno por consumo de cocaína: La búsqueda continúa**  
*Kathleen T. Brady, M.D., Ph.D.*
- 894 Apuntando al TEPT**  
*William M. McDonald, M.D., Sanne J.H. van Rooij, Ph.D.*
- 897 Reducción de la suicidabilidad por medio del tratamiento del insomnio: Próximos pasos críticos en la prevención del suicidio**  
*Jessica L. Hamilton, Ph.D., Daniel J. Buysse, M.D.*

### CONFERENCIA DE CASO CLÍNICO

- 900 Inicio fulminante de encefalopatía hiperamonémica asociada al valproato**  
*Josef Baumgartner, M.D., et al.*

### REVISIÓN Y RESEÑAS

- 904 ¿Hacia dónde va la EMT: Una flor de un día o el inicio de una revolución neurocientífica?**  
*Mark S. George, M.D.*

Si bien la estimulación magnética transcraneal (EMT) ha estado en el armamentario terapéutico por más de una década, la mayor parte de la investigación en esta modalidad examina el trastorno de depresión mayor. Esta reseña de la historia de la investigación que ha llevado al tratamiento con EMT para la depresión también presenta una serie más amplia de estudios recientes que consideran la utilidad clínica de la EMT para varias afecciones además de los trastornos del estado de ánimo.

## NUEVAS INVESTIGACIONES

### ARTÍCULOS

- 911 Cannabidiol para la reducción de la ansiedad y el deseo vehemente de consumir droga inducido por estímulos en individuos con trastorno por consumo de heroína con abstinencia de drogas: Un ensayo doble ciego, aleatorizado, controlado con placebo**

*Yasmin L. Hurd, Ph.D., et al.* EDITORIALE • EMC • AUDIO • VIDEO

El cannabidiol (CBD) generó reducciones significativas de la ansiedad y el deseo vehemente de consumir droga en individuos con trastorno por consumo de heroína. Se observó un efecto prolongado en estas medidas 1 semana después de la administración de CBD, lo que sugiere que el CBD tiene potencial para atenuar los síntomas y signos clínicos relacionados con la adicción.

- 923 Una única infusión de ketamina combinada con modificación comportamental basada en mindfulness para tratar la dependencia de la cocaína: Un ensayo clínico aleatorizado**

*Elias Dakwar, M.D., et al.* EDITORIALE

En un grupo de adultos dependientes de la cocaína, una única infusión de ketamina en combinación con un curso de modificación comportamental basada en mindfulness favoreció la abstinencia y se asoció a una menor probabilidad de tener un deseo vehemente de consumir a un intervalo mayor hasta la recaída.

**931 Eficacia y seguridad de la estimulación magnética transcraneal profunda para el trastorno obsesivo-compulsivo: Un ensayo prospectivo, multicéntrico, doble ciego, aleatorizado y controlado con placebo**

Lior Carmi, Ph.D., et al. VIDEO

Los pacientes con trastorno obsesivo-compulsivo que reciben estimulación magnética transcraneal profunda dirigida a la corteza prefrontal media y a la corteza cingulada anterior tienen una mayor reducción de la gravedad de los síntomas en comparación con la condición control. No se observaron eventos adversos graves, como convulsiones.

**939 Estimulación magnética transcraneal theta burst para el trastorno de estrés postraumático**

Noah S. Philip, M.D., et al. EDITORIALE • EMC

Veteranos con trastorno de estrés postraumático (TEPT) que recibieron una forma nueva de estimulación magnética transcraneal mostraron mejoría en los síntomas clínicos y en medidas de la función social y ocupacional. La mayor parte del beneficio clínico se dio en la primera semana de estimulación activa.

**949 Resultados a largo plazo de la estimulación cerebral profunda cingulada subcallosa para la depresión resistente al tratamiento**

Andrea L. Crowell, M.D., et al.

Ensayos tempranos a corto plazo han sugerido que la estimulación cerebral profunda (ECP) dirigida a la corteza cingulada subcallosa puede ser un tratamiento efectivo para la depresión resistente al tratamiento. En un estudio de resultados naturalistas a largo plazo, de 28 participantes con depresión resistente al tratamiento que recibieron ECP en la corteza cingulada subcallosa por hasta 8 años, se vieron efectos antidepresivos sostenidos en un número significativo de participantes.

**957 Reducción de la ideación suicida por medio del tratamiento del insomnio (REST-IT): Un ensayo clínico aleatorizado**

William V. McCall, M.D., et al. EDITORIALE • EMC

Los pacientes ambulatorios deprimidos, con ideación suicida y con insomnio que tomaron zolpidem de liberación controlada además de un inhibidor selectivo de la recaptación de serotonina (ISRS) tuvieron una mayor reducción de síntomas de insomnio y de pensamientos suicidas, en comparación con aquellos que recibieron placebo más ISRS. No hubo ningún intento de suicidio de los participantes.

**COMUNICADOS Y ACTUALIZACIONES**

**CARTAS AL EDITOR**

**966 La esketamina y la necesidad de un nuevo tipo de registro para los medicamentos con potencial de abuso**

Rupert McShane, M.D., F.R.C.Psych., et al.

**OTROS TEMAS DE INTERÉS**

**967 Educación Médica Continuada**

**Cubierta:** [In an issue discussing innovative and novel treatment strategies, special attention is paid to transcranial magnetic stimulation (coil depicted in center of image), highlighted by an overview provided by Mark George (p. 904). Also featured in this issue are investigations regarding the use of cannabidiol (p. 911) and ketamine (p. 923), the chemical formulas for which are shown on the lower left and upper right, respectively. TMS coil by Rumruay, Shutterstock.com.]

**AUDIO** Article is highlighted in AJP Audio, a downloadable .mp3 file available at [ajp.psychiatryonline.org](http://ajp.psychiatryonline.org)

**EDITORIALE** Article is discussed in one of the issue's editorials

**EMC** A course covering the content of this article is available online for paid subscribers to the AJP CME Course program

**VIDEO** Article is highlighted online by Deputy Editor Daniel S. Pine, M.D.

**La Tabla de Contenidos y los Resúmenes de Este Número Está Disponible en Español**

[This issue's Table of Contents and Abstracts are available in Spanish]

Translation presented in collaboration with the Office of Global Health, Rutgers-Robert Wood Johnson Medical School. Support for this effort provided by ACTA Colombia.

**Translation courtesy of**

**Sergi Casals, M.A.**, Garuna, Medellín, Colombia ([www.garunaeditors.com](http://www.garunaeditors.com))

**Carlos López Jaramillo, M.D., M.Sc., Ph.D.**, Universidad de Antioquia, Medellín, Colombia

**Javier I. Escobar, M.D., M.Sc.**, Rutgers-Robert Wood Johnson Medical School

## ¿Hacia dónde va la EMT: Una flor de un día o el inicio de una revolución neurocientífica?

Mark S. George, M.D.

La psiquiatría ha estado a la vanguardia de los avances de la estimulación magnética transcraneal (EMT) desde mediados de la década de 1990, poco después de la invención de la EMT moderna por el Prof. Tony Barker. La EMT clínica para aplicaciones psiquiátricas está avanzando rápidamente, con métodos nuevos e innovaciones para tratar la depresión y con una nueva indicación clínica en el trastorno obsesivo-compulsivo (TOC). Este artículo de revisión resume los hallazgos recien-

tes y mira el futuro cercano de este campo fértil y rápidamente cambiante. Es posible que muchos psiquiatras, quizás incluso la mayoría, incorporen algún tipo de estimulación cerebral en su práctica en la próxima década. Esta revisión resume las razones de esta visión optimista.

*(Am J Psychiatry 2019; 176:904–910)*

## Cannabidiol para la reducción de la ansiedad y el deseo vehemente de consumir droga inducido por estímulos en individuos con trastorno por consumo de heroína con abstinencia de drogas: Un ensayo doble ciego, aleatorizado, controlado con placebo

Yasmin L. Hurd, Ph.D., Sharron Spriggs, M.A., Julia Alishayev, R.P.A., Gary Winkel, Ph.D., Kristina Gurgov, R.P.A., Chris Kudrich, D.H.Sc., Anna M. Oprescu, M.P.H., Edwin Salsitz, M.D.

**Objetivo:** A pesar de las impactantes consecuencias de la epidemia de opiáceos, es limitado el número de opciones que se han desarrollado con medicamentos no opiáceos para tratar esta crisis médica y de salud pública. Este estudio investigó el potencial del cannabidiol (CBD), un fitocannabinoide no embriagante, para reducir la ansiedad y el deseo vehemente de consumir inducido por estímulos, dos rasgos críticos de la adicción que a menudo contribuyen a la recaída y el consumo continuado de drogas, en individuos con abstinencia de drogas y con trastorno por consumo de heroína.

**Método:** Este ensayo exploratorio, doble ciego, aleatorizado y controlado por placebo evaluó los efectos agudos (1 hora, 2 horas y 24 horas), a corto plazo (3 días consecutivos), y extendidos (7 días después de la última de 3 administraciones diarias) de la administración de CBD (400 o 800 mg, una vez por día por 3 días consecutivos) en la ansiedad y el deseo vehemente de consumir droga inducidas por estímulos en individuos con abstinencia de drogas con trastorno por consumo de heroína. Las medidas secundarias evaluaron el afecto positivo y negativo, la cognición y el estado psicológico de los participantes.

**Resultados:** La administración aguda de CBD, en contraste con el placebo, redujo de manera significativa tanto la ansiedad como el deseo intenso de consumir en respuesta a la presentación de estímulos salientes de droga en comparación con estímulos neutrales. El CBD también mostró efectos extendidos significativos en estas medidas 7 días después de la última exposición a corto plazo (de 3 días) al cannabidiol. Además, el CBD redujo las medidas fisiológicas, inducidas por estímulos de droga, del ritmo cardíaco y niveles de cortisol salival. No hubo efectos significativos en la cognición ni efectos adversos graves.

**Conclusiones:** El potencial del CBD para reducir la ansiedad y el deseo vehemente de consumir inducido por estímulos ofrece una base sólida para futuras investigaciones de este fitocannabinoide como opción de tratamiento para el trastorno por consumo de opiáceos.

*(Am J Psychiatry 2019; 176:911–922)*

# Una única infusión de ketamina combinada con modificación comportamental basada en *mindfulness* para tratar la dependencia de la cocaína: Un ensayo clínico aleatorizado

Elias Dakwar, M.D., Edward V. Nunes, M.D., Carl L. Hart, Ph.D., Richard W. Foltin, Ph.D., Sanjay J. Mathew, M.D., Kenneth M. Carpenter, Ph.D., C.J. "Jean" Choi, M.S., Cale N. Basaraba, M.P.H., Martina Pavlicova, Ph.D., Frances R. Levin, M.D.

**Objetivo:** La investigación ha sugerido que las dosis subanestésicas de ketamina pueden funcionar para mejorar las vulnerabilidades relacionadas con la cocaína y facilitar los esfuerzos para la modificación comportamental. El propósito de este ensayo fue evaluar si una única infusión de ketamina mejoraba los resultados del tratamiento en adultos dependientes de la cocaína que participaban en prevención de recaídas basada en *mindfulness*.

**Método:** Cincuenta y cinco individuos dependientes de la cocaína fueron asignados aleatoriamente para recibir durante 40 minutos una infusión intravenosa de ketamina (0,5 mg/kg) o midazolam (la condición control) durante una estadia de hospitalización de 5 días, durante la cual también iniciaron un curso de 5 semanas de prevención de recaídas basada en *mindfulness*. El consumo de cocaína se evaluó por medio de auto-reportes y un examen toxicológico de la orina. Los resultados primarios fueron la abstinencia al final del estudio y el tiempo hasta la recaída (definida como primer consumo o abandono).

**Resultados:** En general, 48,2% de los individuos en el grupo

de la ketamina mantuvieron la abstinencia durante las 2 semanas del ensayo, en comparación con 10,7% en el grupo de midazolam (análisis de intención de tratar). El grupo de la ketamina tuvo una probabilidad 53% inferior (*hazard ratio*=0,47; IC 95%=0,24, 0,92) de recaer (abandono o consumo de cocaína) en comparación con el grupo de midazolam en el transcurso de todo el ensayo (IC 95%=18,6, 78,6); ambas diferencias fueron significativas estadísticamente. Las infusiones fueron bien toleradas y ningún participante fue retirado del estudio por motivo de eventos adversos.

**Conclusiones:** Una única infusión de ketamina mejoró varios resultados del tratamiento en adultos dependientes de la cocaína que estaban formando parte de una modificación comportamental basada en *mindfulness*, incluyendo el fomento de la abstinencia, la disminución del deseo vehementemente de consumir droga y la reducción del riesgo de recaída. Son necesarias futuras investigaciones para replicar estos resultados promisorios en una muestra más grande.

(*Am J Psychiatry* 2019; 176:923–930)

## Eficacia y seguridad de la estimulación magnética transcraneal profunda para el trastorno obsesivo-compulsivo: Un estudio aleatorizado, doble ciego, controlado con placebo

Lior Carmi, Ph.D., Aron Tendler, M.D., Alexander Bystritsky, M.D., Eric Hollander, M.D., Daniel M. Blumberger, M.D., Jeff Daskalakis, M.D., Herbert Ward, M.D., Kyle Lapidus, M.D., Wayne Goodman, M.D., Leah Casuto, M.D., David Feifel, M.D., Noam Barnea-Ygael, Ph.D., Yiftach Roth, Ph.D., Abraham Zangen, Ph.D., Joseph Zohar, M.D.

**Objetivo:** El trastorno obsesivo-compulsivo (TOC) es una afección crónica e incapacitante que con frecuencia no responde de manera satisfactoria a tratamientos farmacológicos ni psicológicos. Evidencia convergente sugiere una disfunción del circuito cortico-estriatal-talámico-cortical en TOC y un estudio de factibilidad previo indicó efectos beneficiosos de la estimulación magnética transcraneal profunda (EMTP) dirigida a la corteza prefrontal media y la corteza cingulada anterior. Los autores examinaron el efecto terapéutico de la EMTP en un estudio multicéntrico, doble ciego y controlado con una intervención simulada.

**Método:** En 11 centros, 99 pacientes con TOC fueron distribuidos aleatoriamente para recibir o bien EMTP de alta frecuencia (20 Hz) o bien EMTP simulada y recibieron tratamientos diarios después de la provocación de los síntomas, por 6 semanas. La respuesta clínica al tratamiento fue determinada utilizando la Escala Obsesivo-Compulsiva de Yale-Brown (YBOCS, por sus siglas en inglés) y la meta primaria de eficacia fue el cambio en la puntuación en el post-tratamiento con respecto al inicio del estudio. Otras medidas fueron las tasas de respuesta (definidas como una reducción de  $\geq 30\%$  en la puntuación de la escala YBOCS) en la evaluación durante el

post-tratamiento y después de otro mes de seguimiento.

**Resultados:** Ochenta y nueve por ciento del grupo de tratamiento activo y 96% del grupo de tratamiento simulado completaron el estudio. La reducción en la puntuación de la escala YBOCS en los pacientes que recibieron tratamiento activo con EMTP fue significativamente mayor que en los pacientes que recibieron el tratamiento simulado (reducciones de 6,0 puntos y 3,3 puntos, respectivamente), con tasas de respuesta de 38,1% y 11,1%, respectivamente. En el seguimiento después de 1 mes, las tasas de respuesta fueron 45,2% en el grupo de tratamiento activo y 17,8% en el grupo de tratamiento simulado. Se mantuvieron diferencias significativas entre los grupos en el seguimiento.

**Conclusiones:** La EMTP de alta frecuencia en la corteza prefrontal media y la corteza cingulada anterior mejoraron significativamente los síntomas de TOC y pueden considerarse como una potencial intervención para pacientes que no responden adecuadamente a las intervenciones farmacológicas y psicológicas.

(*Am J Psychiatry* 2019; 176:931–938)

## Estimulación magnética transcreaneal *theta burst* para el trastorno de estrés postraumático

Noah S. Philip, M.D., Jennifer Barredo, Ph.D., Emily Aiken, M.A., Victoria Larson, B.S., Richard N. Jones, Sc.D., M. Tracie Shea, Ph.D., Benjamin D. Greenberg, M.D., Ph.D., Mascha van 't Wout-Frank, Ph.D.

**Objetivo:** El trastorno de estrés postraumático (TEPT) es un trastorno psiquiátrico altamente prevalente asociado a la perturbación de la función social y ocupacional. La estimulación magnética transcreaneal (EMT) representa un enfoque novedoso al TEPT y la estimulación *theta-burst* intermitente (ETBi) es un protocolo de administración nuevo, más rápido con datos que apoyan su eficacia en depresión. Los autores realizaron un estudio controlado con una intervención simulada de ETBi para TEPT.

**Método:** Cincuenta veteranos con TEPT recibieron 10 días de ETBi, controlados con una intervención simulada (1.8000 pulsos/día), seguidos de 10 sesiones no-ciegas. Las medidas primarias de resultados, obtenidas al finalizar 2 semanas, incluyeron la aceptabilidad (tasas de retención), los cambios en los síntomas de TEPT (evaluados por los clínicos y por los mismos pacientes), la calidad de vida, la función social y ocupacional, y la depresión; se utilizó el análisis de varianza para comparar la estimulación activa con la simulada. Los resultados secundarios se evaluaron 1 mes después del tratamiento, utilizando análisis de modelos mixtos. Se adquirió IRM funcional en estado de reposo al inicio del estudio, pre-tratamiento, de un subgrupo elegible de participantes (N=26) para identificar los predictores de respuesta.

**Resultados:** La atención fue alta, los efectos secundarios fueron consistentes con la EMT estándar y la implementación de una fase ciega funcionó. A las 2 semanas, la ETBi

activa se asoció de manera significativa a la función social y ocupacional mejorada (de de Cohen=0,39); la depresión fue mejorada con ETBi en comparación con el tratamiento simulado ( $d=-0,45$ ), pero la diferencia no alcanzó a ser significativa y se observaron tamaños de efecto moderados no significativos en los síntomas de TEPT auto-reportados ( $d=-0,34$ ). Los resultados de un mes, que incorporaron datos de la fase no-ciega del estudio, indicaron superioridad de la ETBi activa en los síntomas de TEPT evaluados por los clínicos y por los propios pacientes ( $d=-0,74$  y  $-0,63$ , respectivamente), depresión ( $d=-0,47$ ) y función social y ocupacional ( $d=0,93$ ) (todos significativos). Las neuroimágenes indicaron que la mejoría clínica fue predicha de forma significativa por una conectividad más fuerte (mayor, positiva) dentro la red neuronal por defecto y por una conectividad entre redes anticorrelacionada (mayor, negativa).

**Conclusiones:** La ETBi parece ser un nuevo tratamiento promisorio para el TEPT. La mayoría de las mejorías clínicas a partir de la estimulación ocurrieron temprano, lo que sugiere la necesidad de seguir investigando sobre el curso de tiempo y la duración óptimos de la ETBi. Igual que en estudios de neuroimágenes anteriores sobre EMT, la conectividad de la red neuronal por defecto jugó un papel importante en la predicción de las repuestas.

(*Am J Psychiatry* 2019; 176:939–948)

## Resultados a largo plazo de la estimulación cerebral profunda cingulada subcallosa para la depresión resistente al tratamiento

Andrea L. Crowell, M.D., Patricio Riva-Posse, M.D., Paul E. Holtzheimer, M.D., Steven J. Garlow, M.D., Ph.D., Mary E. Kelley, Ph.D., Robert E. Gross, M.D., Ph.D., Lydia Denison, B.S., Sinead Quinn, B.S., Helen S. Mayberg, M.D.

**Objetivo:** La estimulación cerebral profunda de la corteza cingulada subcallosa (ECP cingulada subcallosa) se ha estudiado como un tratamiento potencial para el trastorno de depresión mayor grave y refractario desde 2005. Los autores utilizaron un diseño de etiqueta abierta, con seguimiento a largo plazo para examinar a los participantes que formaban parte de un ensayo clínico de ECP cingulada subcallosa para la depresión resistente al tratamiento.

**Método:** Se recogieron datos de resultados a largo plazo de 28 pacientes (20 con trastorno de depresión mayor y siete con trastorno bipolar II; un paciente en el subgrupo con depresión mayor posteriormente fue reclasificado como en trastorno bipolar II) que recibieron ECP cingulada subcallosa por 4–8 años.

**Resultados:** Las tasas de respuesta y de remisión se mantuvieron en  $\geq 50\%$  y  $\geq 30\%$ , respectivamente, en los años 2–8 del período de seguimiento. Tres cuartos de los participantes

cumplieron el criterio de respuesta al tratamiento durante más de la mitad del tiempo en el que estuvieron participando en el estudio y 21% de todos los pacientes mostraron una respuesta continua al tratamiento a partir del primer año en adelante. De 28 participantes, 14 completaron  $\geq 8$  años de seguimiento, 11 completaron  $\geq 4$  años y tres se retiraron antes de los 8 años. El mismo procedimiento fue generalmente seguro y bien tolerado, y no hubo efectos secundarios de estimulación aguda o crónica. La tasa de complicaciones médicas o quirúrgicas fue consistente con la tasa observada en estudios de ECP cingulada subcallosa para otras indicaciones. No hubo ningún suicidio.

**Conclusiones:** En  $>8$  años de observación, la mayoría de los pacientes experimentaron una respuesta antidepresiva robusta y sostenida a la ECP cingulada subcallosa.

(*Am J Psychiatry* 2019; 176:949–956)



## Reducción de la ideación suicida por medio del tratamiento del insomnio (REST-IT): Un ensayo clínico aleatorizado

William V. McCall, M.D., Ruth M. Benca, M.D., Peter B. Rosenquist, M.D., Nagy A. Youssef, M.D., Laryssa McCloud, Ph.D., Jill C. Newman, M.S., Doug Case, Ph.D., Meredith E. Rumble, Ph.D., Steven T. Szabo, M.D., Ph.D., Marjorie Phillips, M.S., Andrew D. Krystal, M.D.

**Objetivo:** El objetivo de los autores fue determinar si el tratamiento del insomnio con zolpidem de liberación controlada (zolpidem-CR) en adultos con ideación suicida y con insomnio brindaría una reducción de la ideación suicida, superior a la lograda con placebo.

**Método:** *Reducción de la Ideación Suicida por medio del Tratamiento del Insomnio* fue un ensayo de 8 semanas en 3 sedes, doble ciego, controlado con placebo y también controlado con grupos paralelos. Consistió en comparar la terapia hipnótica con zolpidem-CR y la misma terapia con placebo. En ambos casos la terapia hipnótica se realizó en conjunto con un inhibidor selectivo de la recaptación de serotonina de etiqueta abierta. Los participantes fueron individuos de entre 18 y 65 años que no tomaban medicamento, con trastorno de depresión mayor, insomnio e ideación suicida. La ideación suicida fue el principal resultado, medido en primer lugar con la Escala para la Ideación Suicida y en segundo lugar con la Escala de Columbia para la Evaluación de la Gravedad del Suicidio (C-SSRS).

**Resultados:** Un total de 103 participantes fueron asignados aleatoriamente para recibir zolpidem-CR (N=51) o placebo (N=52) (64 mujeres y 39 hombres; edad media=40,5 años).

Zolpidem-CR tuvo un efecto anit-insomnio robusto, especialmente en pacientes con los síntomas de insomnio más graves. No se observó ningún efecto significativo del tratamiento en la Escala para la Ideación Suicida (estimado de la media de mínimos cuadrados=-0,56; SE=0,83; IC 95%=-2,19, 1,08), pero la reducción de las puntuaciones tuvo una correlación positiva significativa con la mejoría del insomnio después de explicar el efecto de otros síntomas de depresión. La escala C-SSRS indicó que el zolpidem-CR tuvo un efecto de tratamiento significativo (estimado de la media de mínimos cuadrados=-0,26; SE=0,12; IC 95%=-0,50, -0,02). La ventaja para zolpidem-CR de reducir la ideación suicida en la escala C-SSRS fue mejor en pacientes con insomnio más severo. No se dieron muertes ni intentos de suicidio.

**Conclusiones:** Aunque los resultados no apoyan la prescripción de rutina de la medicación hipnótica para mitigar la ideación suicida en todos los pacientes ambulatorios con insomnio, sugieren que la co-prescripción de un hipnótico durante la iniciación de un antidepresivo puede ser beneficiosa en los pacientes ambulatorios con ideación suicida, especialmente en los pacientes con insomnio severo.

(*Am J Psychiatry* 2019; 176:957-965)
